# Supplementary material for: Cohort-specific imputation of gene expression improves prediction of warfarin dose for African Americans
Source: PubMed Central journal article supplement (PMC5702158; doi:10.1186/s13073-017-0495-0), 2017-11-24
Supplement: 13073_2017_495_MOESM1_ESM.pdf [file 13073_2017_495_MOESM1_ESM.pdf]

# **Cohort-specific imputation of gene expression improves prediction of warfarin dose for African Americans**

## **Supplementary information**

Assaf Gottlieb, PhD <sup>1\*</sup>, Roxana Daneshjou, MD, PhD <sup>2</sup>, Marianne DeGorter, PhD <sup>2,3</sup>, , Stephane Bourgeois, MsC <sup>4</sup>, Peter J. Svensson, MD, PhD <sup>5</sup>, Mia Wadelius, MD, PhD <sup>6</sup>, Panos Deloukas , PhD <sup>4,7</sup>, Stephen B. Montgomery, PhD <sup>2,3</sup> & Russ B. Altman, MD, PhD <sup>2,8</sup>.

<sup>1</sup> *School of Biomedical Informatics, University of Texas Health Center, Houston, 77030*

<sup>2</sup> *Department of Genetics, Stanford University, Stanford, 94305*

<sup>3</sup> *Department of Pathology, Stanford University, Stanford, 94305*

<sup>4</sup> *William Harvey Research Institute, Barts and the London School of Medicine and Dentistry, Queen Mary University of London, London, United Kingdom, EC1M 6BQ*

<sup>5</sup> *Department of Translational Medicine, University of Lund, Malmö, Sweden, SE-205 02*

<sup>6</sup> *Department of Medical Sciences and Science for Life laboratory, Uppsala University, Uppsala, Sweden, SE-751 85*

<sup>7</sup> *Princess Al-Jawhara Al-Brahim Centre of Excellence in Research of Hereditary Disorders (PACER-HD), King Abdulaziz University, Jeddah, Saudi Arabia, 21589*

<sup>8</sup> *Department of Bioengineering, Stanford University, Stanford, 94305*

## Supplementary Figures

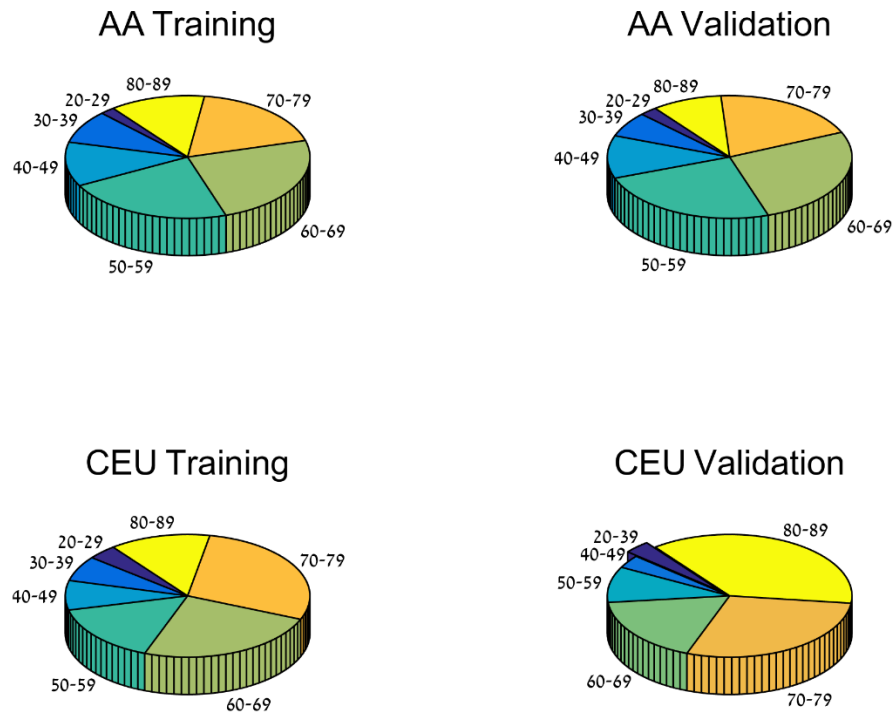

**Figure S1:** Age distribution for each of the warfarin study cohorts.

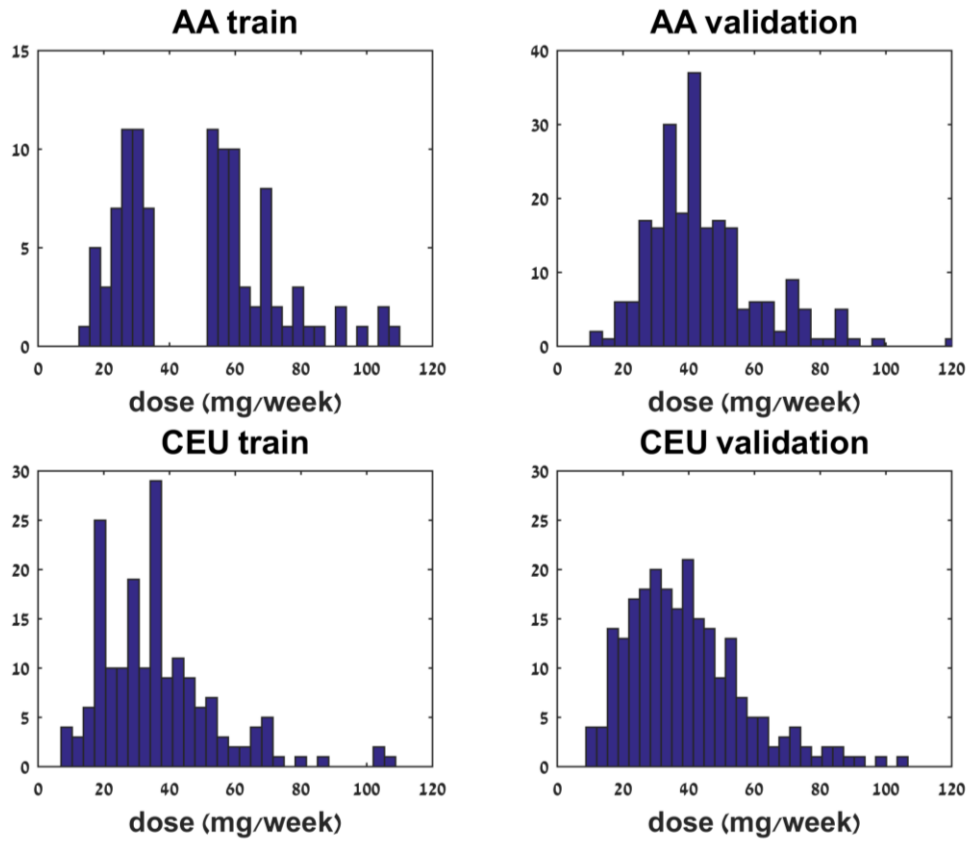

**Figure S2:** Weekly dose distribution or each of the warfarin study cohorts.

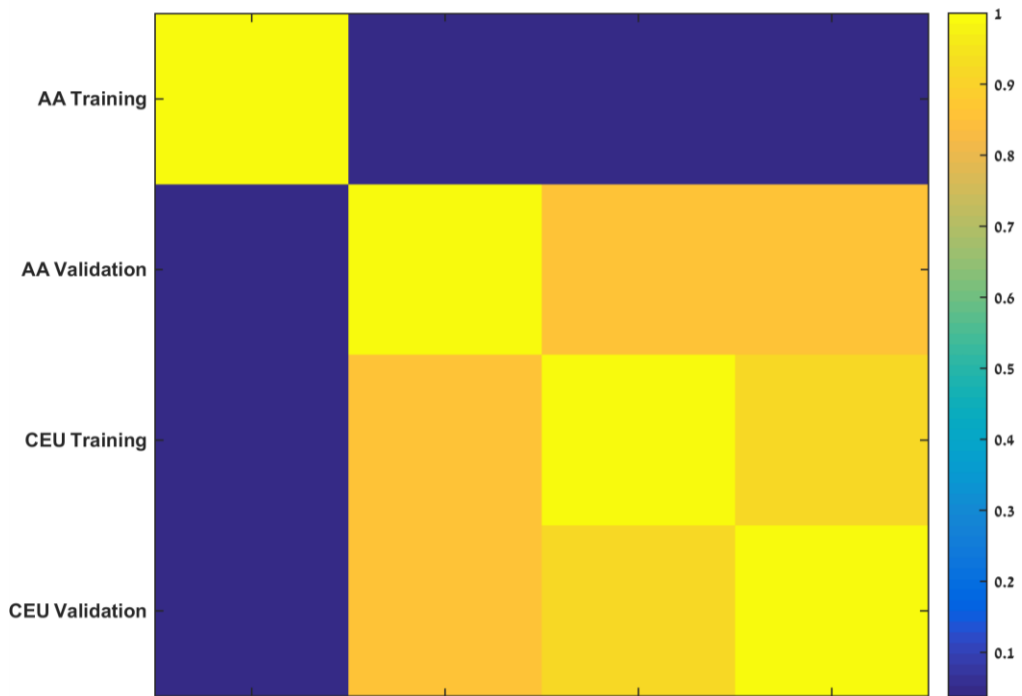

**Figure S3:** Relative overlap of measured cis-SNPs between cohorts (Jaccard score).

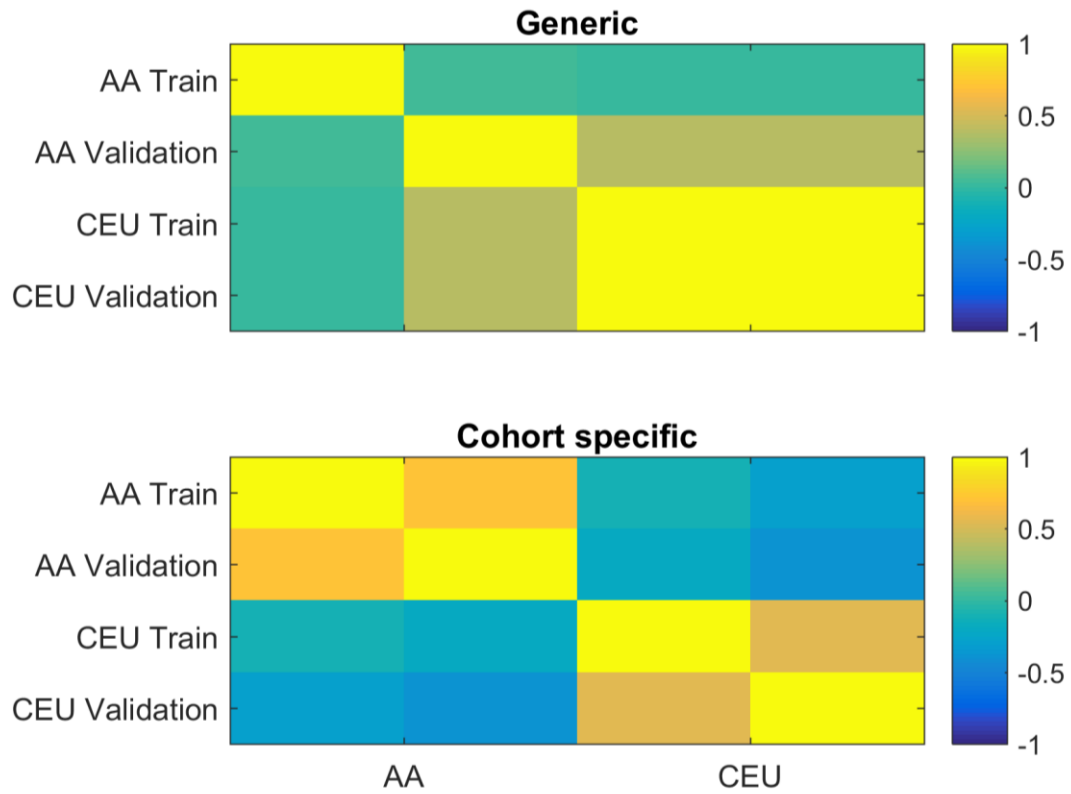

**Figure S4:** Pearson correlations between imputed gene expression means across cohorts for the generic and cohort-specific imputation methods.

## Supplementary Tables

Table S1. List of warfarin-associated genes

| Warfarin relation | Gene Name | Ensemble ID     | Gene Description                                                                      |
|-------------------|-----------|-----------------|---------------------------------------------------------------------------------------|
| Curated           | ABCB1     | ENSG00000085563 | ATP-binding cassette, sub-family B (MDR/TAP), member 1                                |
| Inferred          | ABL1      | ENSG00000097007 | c-abl oncogene 1, receptor tyrosine kinase                                            |
| Inferred          | ADCY9     | ENSG00000162104 | adenylate cyclase 9                                                                   |
| Inferred          | AKT1      | ENSG00000142208 | v-akt murine thymoma viral oncogene homolog 1                                         |
| Inferred          | ALOX5     | ENSG00000012779 | arachidonate 5-lipoxygenase                                                           |
| Curated           | ALOX5AP   | ENSG00000132965 | arachidonate 5-lipoxygenase-activating protein                                        |
| Inferred          | ARRB1     | ENSG00000137486 | arrestin, beta 1                                                                      |
| Inferred          | ARRB2     | ENSG00000141480 | arrestin, beta 2                                                                      |
| Inferred          | ATF2      | ENSG00000115966 | activating transcription factor 2                                                     |
| Inferred          | AURKA     | ENSG00000087586 | aurora kinase A; aurora kinase A pseudogene 1                                         |
| Inferred          | BCL2      | ENSG00000171791 | B-cell CLL/lymphoma 2                                                                 |
| Inferred          | BDKRB2    | ENSG00000168398 | bradykinin receptor B2                                                                |
| Curated           | BGLAP     | ENSG00000160783 | bone gamma-carboxyglutamate (gla) protein; polyamine-modulated factor 1               |
| Inferred          | C1QBP     | ENSG00000108561 | complement component 1, q subcomponent binding protein                                |
| Curated           | CALU      | ENSG00000128595 | calumenin                                                                             |
| Inferred          | CAV1      | ENSG00000105974 | caveolin 1, caveolae protein, 22kDa                                                   |
| Inferred          | CCND1     | ENSG00000110092 | cyclin D1                                                                             |
| Inferred          | CDK2      | ENSG00000123374 | cyclin-dependent kinase 2                                                             |
| Inferred          | CDK4      | ENSG00000135446 | cyclin-dependent kinase 4                                                             |
| Inferred          | CDK5      | ENSG00000164885 | cyclin-dependent kinase 5                                                             |
| Inferred          | CHUK      | ENSG00000213341 | conserved helix-loop-helix ubiquitous kinase                                          |
| Inferred          | CRKL      | ENSG00000099942 | v-crk sarcoma virus CT10 oncogene homolog (avian)-like                                |
| Inferred          | CSNK2A1   | ENSG00000101266 | casein kinase 2, alpha 1 polypeptide pseudogene; casein kinase 2, alpha 1 polypeptide |
| Inferred          | CSNK2B    | ENSG00000204435 | lymphocyte antigen 6 complex, locus G5B; casein kinase 2, beta polypeptide            |
| Inferred          | CTNNB1    | ENSG00000168036 | catenin (cadherin-associated protein), beta 1, 88kDa                                  |
| Inferred          | CUBN      | ENSG00000107611 | cubilin (intrinsic factor-cobalamin receptor)                                         |
| Curated           | CYP1A1    | ENSG00000140465 | cytochrome P450, family 1, subfamily A, polypeptide 1                                 |
| Inferred          | CYP2B6    | ENSG00000197408 | cytochrome P450, family 2, subfamily B, polypeptide 6                                 |
| Curated           | CYP2C18   | ENSG00000108242 | cytochrome P450, family 2, subfamily C, polypeptide 18                                |

|          |         |                 |                                                                                                    |
|----------|---------|-----------------|----------------------------------------------------------------------------------------------------|
| Curated  | CYP2C19 | ENSG00000165841 | cytochrome P450, family 2, subfamily C, polypeptide 19                                             |
| Curated  | CYP2C8  | ENSG00000138115 | cytochrome P450, family 2, subfamily C, polypeptide 8                                              |
| Curated  | CYP2C9  | ENSG00000138109 | cytochrome P450, family 2, subfamily C, polypeptide 9                                              |
| Curated  | CYP3A4  | ENSG00000160868 | cytochrome P450, family 3, subfamily A, polypeptide 4                                              |
| Inferred | CYP3A43 | ENSG00000021461 | cytochrome P450, family 3, subfamily A, polypeptide 43                                             |
| Inferred | DAB1    | ENSG00000173406 | disabled homolog 1 (Drosophila)                                                                    |
| Inferred | DLL1    | ENSG00000198719 | delta-like 1 (Drosophila)                                                                          |
| Inferred | DVL1    | ENSG00000107404 | dishevelled, dsh homolog 1 (Drosophila); dishevelled, dsh homolog 1 (Drosophila)-like 1            |
| Inferred | DVL2    | ENSG00000004975 | dishevelled, dsh homolog 2 (Drosophila)                                                            |
| Inferred | EGFR    | ENSG00000146648 | epidermal growth factor receptor (erythroblastic leukemia viral (v-erb-b) oncogene homolog, avian) |
| Inferred | EP300   | ENSG00000100393 | E1A binding protein p300                                                                           |
| Curated  | EPHX1   | ENSG00000143819 | epoxide hydrolase 1, microsomal (xenobiotic)                                                       |
| Curated  | ESR1    | ENSG00000091831 | estrogen receptor 1                                                                                |
| Inferred | ETS1    | ENSG00000134954 | v-ets erythroblastosis virus E26 oncogene homolog 1 (avian)                                        |
| Curated  | F10     | ENSG00000126218 | coagulation factor X                                                                               |
| Curated  | F13A1   | ENSG00000124491 | coagulation factor XIII, A1 polypeptide                                                            |
| Inferred | F2R     | ENSG00000181104 | coagulation factor II (thrombin) receptor                                                          |
| Inferred | F2RL2   | ENSG00000164220 | coagulation factor II (thrombin) receptor-like 2                                                   |
| Curated  | F5      | ENSG00000198734 | coagulation factor V (proaccelerin, labile factor)                                                 |
| Curated  | F7      | ENSG00000057593 | coagulation factor VII (serum prothrombin conversion accelerator)                                  |
| Inferred | FGA     | ENSG00000171560 | fibrinogen alpha chain                                                                             |
| Inferred | FN1     | ENSG00000115414 | fibronectin 1                                                                                      |
| Curated  | GAS6    | ENSG00000183087 | similar to growth arrest-specific 6; growth arrest-specific 6                                      |
| Curated  | GCLC    | ENSG00000001084 | glutamate-cysteine ligase, catalytic subunit                                                       |
| Curated  | GCLM    | ENSG00000023909 | glutamate-cysteine ligase, modifier subunit                                                        |
| Curated  | GGCX    | ENSG00000115486 | gamma-glutamyl carboxylase                                                                         |
| Inferred | GNA13   | ENSG00000120063 | guanine nucleotide binding protein (G protein), alpha 13                                           |
| Inferred | GNAI2   | ENSG00000114353 | guanine nucleotide binding protein (G protein), alpha inhibiting activity polypeptide 2            |
| Inferred | GRB2    | ENSG00000177885 | growth factor receptor-bound protein 2                                                             |
| Inferred | GSS     | ENSG00000100983 | glutathione synthetase                                                                             |
| Inferred | HNF1A   | ENSG00000135100 | HNF1 homeobox A                                                                                    |
| Inferred | HNF4A   | ENSG00000101076 | hepatocyte nuclear factor 4, alpha                                                                 |

|          |          |                 |                                                                                              |
|----------|----------|-----------------|----------------------------------------------------------------------------------------------|
| Inferred | HSPA4    | ENSG00000170606 | heat shock 70kDa protein 4                                                                   |
| Curated  | HTRA1    | ENSG00000166033 | HtrA serine peptidase 1                                                                      |
| Inferred | ITGA2B   | ENSG00000005961 | integrin, alpha 2b (platelet glycoprotein IIb of IIb/IIIa complex, antigen CD41)             |
| Inferred | ITGA4    | ENSG00000115232 | integrin, alpha 4 (antigen CD49D, alpha 4 subunit of VLA-4 receptor)                         |
| Inferred | ITGB1    | ENSG00000150093 | integrin, beta 1 (fibronectin receptor, beta polypeptide, antigen CD29 includes MDF2, MSK12) |
| Curated  | ITGB3    | ENSG00000056345 | integrin, beta 3 (platelet glycoprotein IIIa, antigen CD61)                                  |
| Inferred | JUN      | ENSG00000177606 | jun oncogene                                                                                 |
| Curated  | KCNE2    | ENSG00000159197 | potassium voltage-gated channel, Isk-related family, member 2                                |
| Curated  | KCNQ1    | ENSG00000053918 | potassium voltage-gated channel, KQT-like subfamily, member 1                                |
| Inferred | KNG1     | ENSG00000113889 | kininogen 1                                                                                  |
| Curated  | LGALS2   | ENSG00000100079 | lectin, galactoside-binding, soluble, 2                                                      |
| Curated  | LRP8     | ENSG00000157193 | low density lipoprotein receptor-related protein 8, apolipoprotein e receptor                |
| Inferred | LRPAP1   | ENSG00000163956 | low density lipoprotein receptor-related protein associated protein 1                        |
| Inferred | MAPK1    | ENSG00000100030 | mitogen-activated protein kinase 1                                                           |
| Curated  | MGP      | ENSG00000111341 | matrix Gla protein                                                                           |
| Inferred | MMP9     | ENSG00000100985 | matrix metalloproteinase 9 (gelatinase B, 92kDa gelatinase, 92kDa type IV collagenase)       |
| Inferred | MYC      | ENSG00000136997 | v-myc myelocytomatosis viral oncogene homolog (avian)                                        |
| Inferred | NCOA1    | ENSG00000084676 | nuclear receptor coactivator 1                                                               |
| Curated  | NOS3     | ENSG00000164867 | nitric oxide synthase 3 (endothelial cell)                                                   |
| Curated  | NOTCH3   | ENSG00000074181 | Notch homolog 3 (Drosophila)                                                                 |
| Inferred | PAFAH1B1 | ENSG00000007168 | platelet-activating factor acetylhydrolase, isoform Ib, subunit 1 (45kDa)                    |
| Curated  | PDE4D    | ENSG00000113448 | phosphodiesterase 4D, cAMP-specific (phosphodiesterase E3 dunce homolog, Drosophila)         |
| Inferred | PLA2G4A  | ENSG00000116711 | phospholipase A2, group IVA (cytosolic, calcium-dependent)                                   |
| Inferred | PLCG2    | ENSG00000197943 | phospholipase C, gamma 2 (phosphatidylinositol-specific)                                     |
| Inferred | PRKACA   | ENSG00000072062 | protein kinase, cAMP-dependent, catalytic, alpha                                             |
| Inferred | PRKCA    | ENSG00000154229 | protein kinase C, alpha                                                                      |
| Inferred | PRKCB    | ENSG00000166501 | protein kinase C, beta                                                                       |
| Curated  | PRKCH    | ENSG00000027075 | protein kinase C, eta                                                                        |
| Curated  | PROC     | ENSG00000115718 | protein C (inactivator of coagulation factors Va and VIIIa)                                  |
| Curated  | PROS1    | ENSG00000184500 | protein S (alpha)                                                                            |



|          |          |                 |                                                                                                        |
|----------|----------|-----------------|--------------------------------------------------------------------------------------------------------|
| Curated  | PROZ     | ENSG00000126231 | protein Z, vitamin K-dependent plasma glycoprotein                                                     |
| Inferred | PSEN1    | ENSG00000080815 | presenilin 1                                                                                           |
| Inferred | PSMA5    | ENSG00000143106 | proteasome (prosome, macropain) subunit, alpha type, 5                                                 |
| Curated  | PSMA6    | ENSG00000100902 | proteasome (prosome, macropain) subunit, alpha type, 6                                                 |
| Inferred | PTGS2    | ENSG00000073756 | prostaglandin-endoperoxide synthase 2 (prostaglandin G/H synthase and cyclooxygenase)                  |
| Inferred | PTK2     | ENSG00000169398 | PTK2 protein tyrosine kinase 2                                                                         |
| Inferred | RAC1     | ENSG00000136238 | ras-related C3 botulinum toxin substrate 1 (rho family, small GTP binding protein Rac1)                |
| Inferred | RAF1     | ENSG00000132155 | v-raf-1 murine leukemia viral oncogene homolog 1                                                       |
| Inferred | SERPINF2 | ENSG00000167711 | serpin peptidase inhibitor, clade F (alpha-2 antiplasmin, pigment epithelium derived factor), member 2 |
| Inferred | SMAD2    | ENSG00000175387 | SMAD family member 2                                                                                   |
| Inferred | SMAD3    | ENSG00000166949 | SMAD family member 3                                                                                   |
| Inferred | SMAD4    | ENSG00000141646 | SMAD family member 4                                                                                   |
| Inferred | SNAP25   | ENSG00000132639 | synaptosomal-associated protein, 25kDa                                                                 |
| Inferred | SRC      | ENSG00000197122 | v-src sarcoma (Schmidt-Ruppin A-2) viral oncogene homolog (avian)                                      |
| Curated  | STX4     | ENSG00000103496 | syntaxin 4                                                                                             |
| Inferred | TFPI     | ENSG00000003436 | tissue factor pathway inhibitor (lipoprotein-associated coagulation inhibitor)                         |
| Inferred | THBS1    | ENSG00000137801 | thrombospondin 1                                                                                       |
| Inferred | TNFRSF1A | ENSG00000067182 | tumor necrosis factor receptor superfamily, member 1A                                                  |
| Inferred | TNFRSF1B | ENSG00000028137 | tumor necrosis factor receptor superfamily, member 1B                                                  |
| Curated  | TNFSF4   | ENSG00000117586 | tumor necrosis factor (ligand) superfamily, member 4                                                   |
| Inferred | TP53     | ENSG00000141510 | tumor protein p53                                                                                      |
| Inferred | TRAF6    | ENSG00000175104 | TNF receptor-associated factor 6                                                                       |
| Inferred | TUBA1A   | ENSG00000167552 | tubulin, alpha 1a                                                                                      |
| Inferred | UBE2I    | ENSG00000103275 | ubiquitin-conjugating enzyme E2I (UBC9 homolog, yeast)                                                 |
| Curated  | VKORC1   | ENSG00000167397 | vitamin K epoxide reductase complex, subunit 1                                                         |
